# Supplementary material
Source: PubMed Central journal article supplement (PMC6485395)
Supplement: NIHMS80544-supplement-Supplementary_Materials.pdf [file NIHMS80544-supplement-Supplementary_Materials.pdf]

## Supplementary Materials for

### **Inhibition of somatosensory mechanotransduction by annexin A6**

Ramin Raouf, Stéphane Lolignier, Jane E. Sexton, Queensta Millet,  
Sonia Santana-Varela, Anna Biller, Alice M. Fuller, Vanessa Pereira, Jyoti S. Choudhary,  
Mark O. Collins, Stephen E. Moss, Richard Lewis, Julie Tordo, Els Henckaerts,  
Michael Linden, John N. Wood\*

\*Corresponding author. Email: j.wood@ucl.ac.uk

Published 19 June 2018, *Sci. Signal.* **11**, eaao2060 (2018)

DOI: 10.1126/scisignal.aao2060

#### **The PDF file includes:**

Fig. S1. Isolation of NMB-1 peptide-binding partners.  
Fig. S2. Interaction between NMB-1 and annexin A6.  
Fig. S3. Representative traces of MA currents in vitro.  
Fig. S4. ATP6V1B2 does not confer mechanosensitivity to HEK or ND-C cells but inhibits Piezo2 current.  
Fig. S5. Transduction of DRG neurons using AAV-TT serotype.  
Table S1. Top NMB-1-binding candidates in ND-C cells.  
Legends for data files S1 and S2

#### **Other Supplementary Material for this manuscript includes the following:**

(available at [www.sciencesignaling.org/cgi/content/full/11/535/eaao2060/DC1](http://www.sciencesignaling.org/cgi/content/full/11/535/eaao2060/DC1))

Data file S1 (Microsoft Excel format). NMB-1-binding candidates in DRG neurons.

Data file S2 (Microsoft Excel format). NMB-1-binding candidates from differentiated ND-C cells.

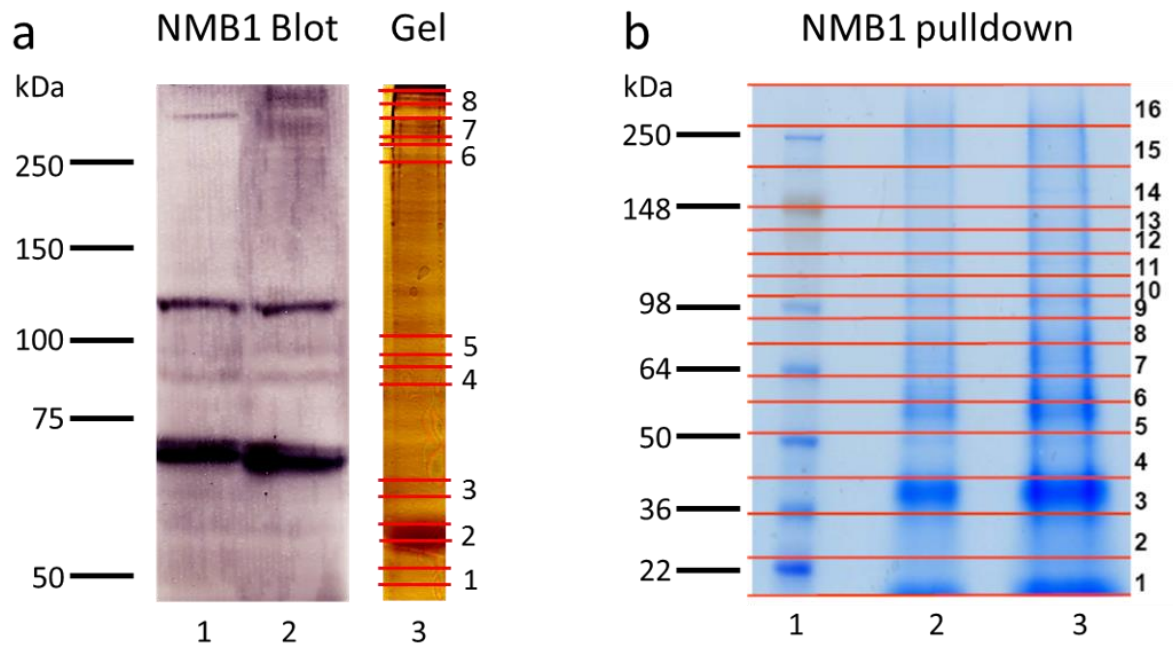

**Figure S1. Isolation of NMB-1 peptide-binding partners.** (a) Biotinylated NMB-1 was used to visualize binding silver stained SDS gel loaded with DRG protein extract processed under the same conditions is juxtaposed alongside the NMB-1 stained blot (3). Silver stained gel with reactive bands on the NMB-1 blot that were excised (location of the bands shown with red lines) and processed for LC MS/MS analysis. (b) NMB-1 pulled from differentiated ND-C cell protein extracts was treated with 2% (lane 2) or 4% (lane 3) beta-mercaptoethanol and resolved on 10% SDS gel. The gel was cut into 16 strips and processed for LC MS/MS analysis.

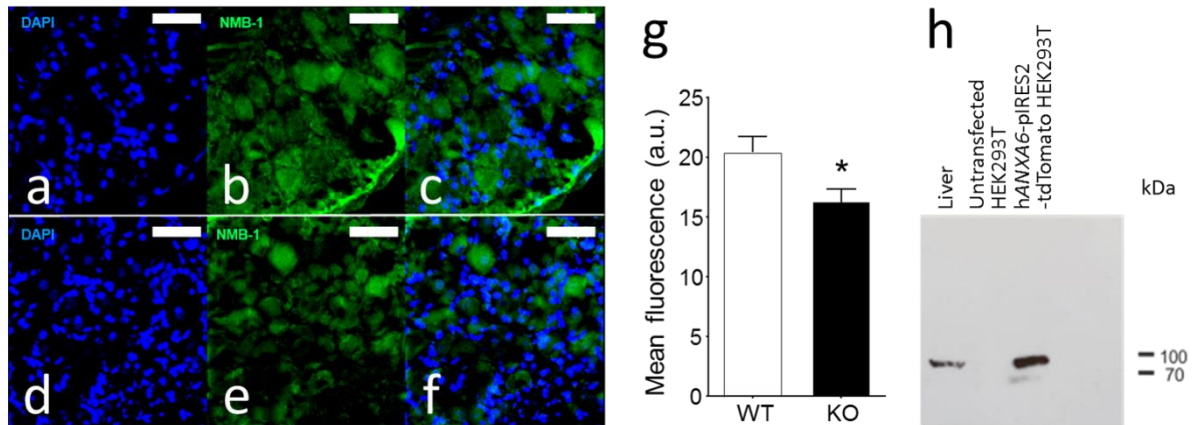

**Figure S2. Interaction between NMB-1 and annexin A6.** (a-g) WT (a-c) and *Anxa6* KO (d-f) DRG sections were incubated with bNMB-1 followed by FITC-Avidin (scale bars = 50  $\mu$ m) and the fluorescence intensity was quantified (g) ( $p=0.0298$ ,  $n=10$  and represent sections obtained from 2 mice per group). (h) Direct interaction of annexin A6 and NMB-1 was probed using Western blot. The panel shows expression of annexin A6 in mouse liver, *hANXA6*-pIRES2-tdTomato expressing HEK293T cells, and untransfected HEK293T cells (negative control).

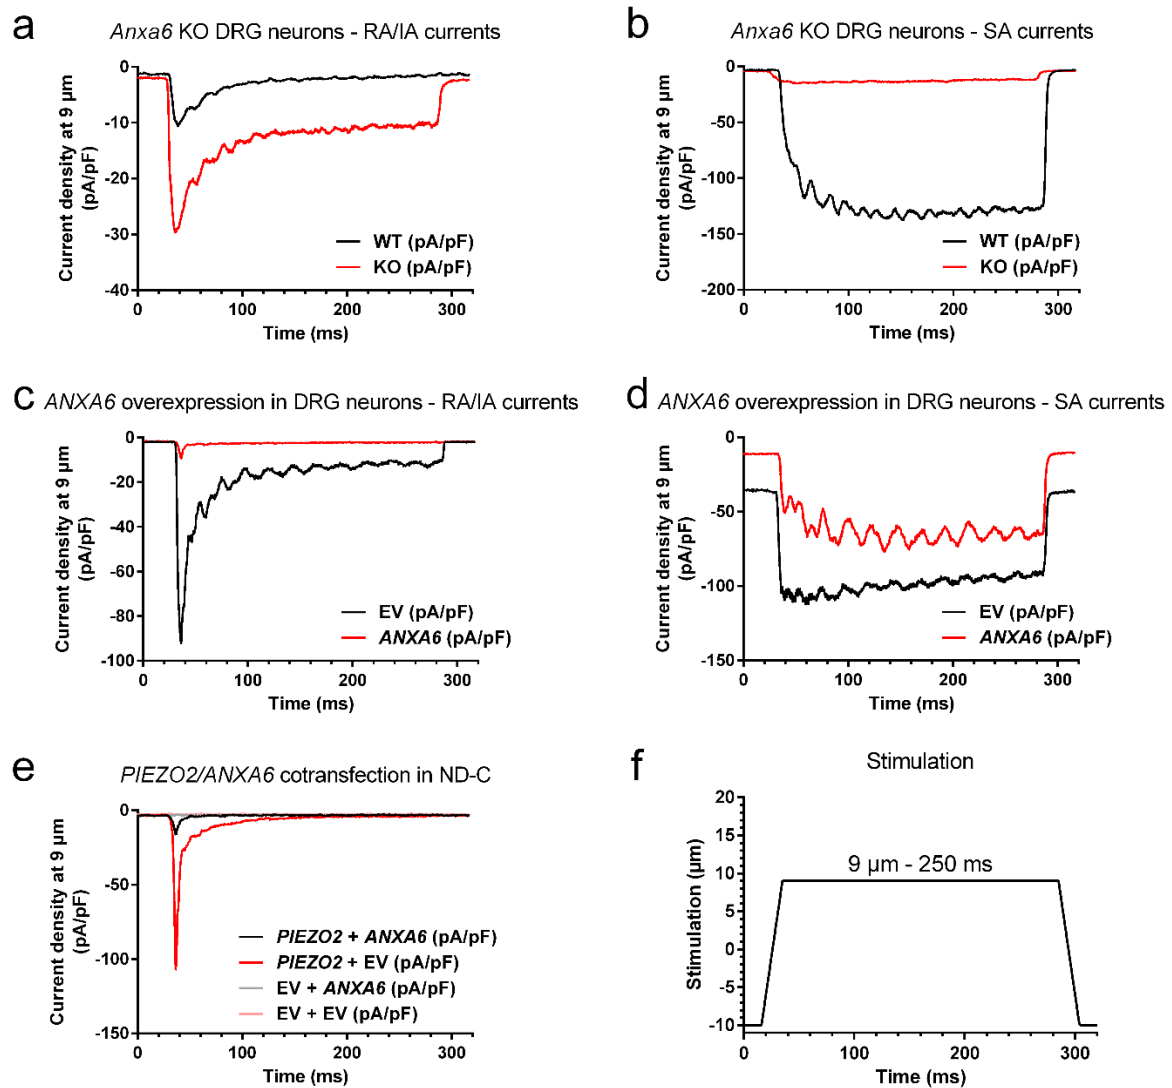

**Figure S3. Representative traces of MA currents in vitro.** (a-b) RA/IA and SA currents recorded in *Anxa6* KO DRG neurons, representative of the data given in Fig. 2. (c-d) RA/IA and SA currents recorded in WT DRG neurons overexpressing *hANXA6*, representative of the data given in Fig. 3. (e) RA currents recorded in ND-C cells transfected with *hPIEZO2* ± *hANXA6* or their respective empty vectors, representative of the data given in Fig. 4. (f) All current traces shown were recorded in response to a 9 μm deformation of the plasma membrane by a firepolished glass pipette, lasting for 250 ms.

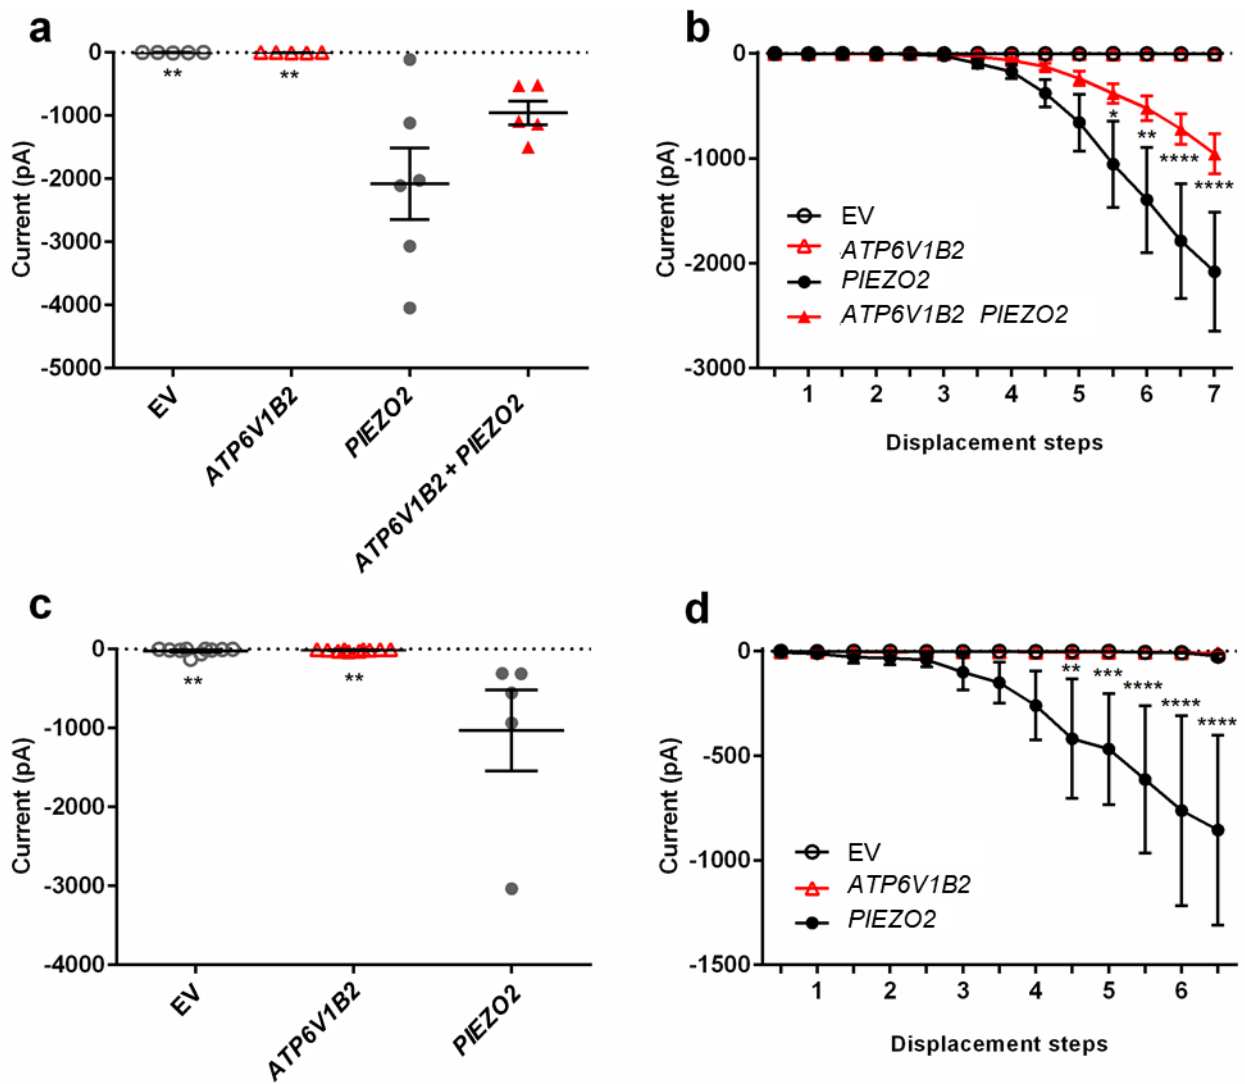

**Figure S4. ATP6V1B2 does not confer mechanosensitivity to HEK or ND-C cells but inhibits Piezo2 current.** Peak current (a) and current-displacement curve (b) for HEK cells transfected with hATP6V1B2. Peak current (c) and current-displacement curve (b) for ND-C cells transfected with hATP6V1B2. (HEK cells: ATP6V1B2 n=10; EV n=10; PIEZO2 n=5; ATP6V1B2 + PIEZO2 n=5; ND-C cells: ATP6V1B2 n=10; EV n=10; PIEZO2 n=5). Data are shown as Mean±SEM. One way ANOVA with Dunnett's post-hoc test (statistics shown on graph is each group compared to PIEZO2) (a,c); Two-way repeated measures ANOVA with Tukey post-hoc test (statistics shown on graph is ATP6V1B2+PIEZO2 compared to PIEZO2) (b); Two-way repeated measure ANOVA with Tukey post-hoc test (statistics shown on graph is ATP6V1B2 compared to PIEZO2) (d). \*p<0.05, \*\*p<0.01, \*\*\*p<0.001; \*\*\*\*p<0.0001.

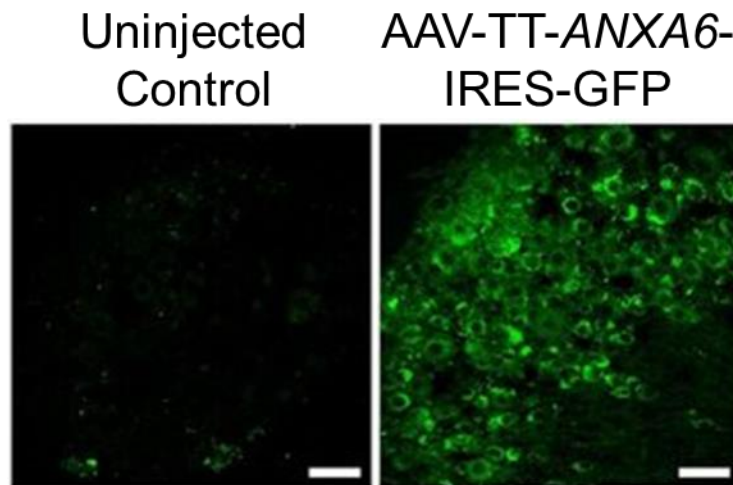

**Figure S5. Transduction of DRG neurons using AAV-TT serotype.** 15 weeks after intrathecal injection, robust GFP expression was observed in lumbar DRG of animals treated with AAV-TT-*hANXA6*-IRES-GFP compared to untreated animals. Similar results were obtained from 3 different animals per condition. Scale bar, 50  $\mu$ m.

**Table S1. Top NMB-1-binding candidates in ND-C cells.**

| <b>Protein</b> |                                                                                          | <b>UniprotKB</b> | <b>MW</b> | <b>NMB-1<br/>Peptide hits</b> |
|----------------|------------------------------------------------------------------------------------------|------------------|-----------|-------------------------------|
| Anxa6          | Annexin A6                                                                               | P14824           | 75,838    | 24                            |
| Atic           | 5-aminoimidazole-4-carboxamide<br>ribonucleotide formyltransferase/IMP<br>cyclohydrolase | B0LAC5           | 64,117    | 6                             |
| Atp6v1b2       | Vacuolar ATP synthase subunit B, brain<br>isoform                                        | P62814           | 56,515    | 4                             |
| Abcb10         | ATP-binding cassette sub-family B<br>member 10, mitochondrial                            | Q9JI39           | 73,972    | 4                             |
| Anxa5          | Annexin A5                                                                               | P48036           | 35,730    | 4                             |
| G6pdx          | Glucose-6-phosphate 1-dehydrogenase X                                                    | Q00612           | 59,225    | 4                             |
| Hspa9          | Stress-70 protein, mitochondrial precursor                                               | P38647           | 44,145    | 3                             |
| Rps3           | 40S ribosomal protein S3                                                                 | P62908           | 26,674    | 3                             |
| Msn            | Moesin                                                                                   | P26041           | 67,725    | 3                             |
| Stxbp1         | Isoform 1 of Syntaxin-binding protein 1                                                  | O08599           | 67,526    | 3                             |
| Hspa11         | Heat shock 70 kDa protein 1L                                                             | P16627           | 70,593    | 3                             |
| Ppp2r1a        | Serine/threonine-protein phosphatase 2A<br>65 kDa regulatory subunit A alpha isoform     | Q76MZ3           | 65,281    | 3                             |
| Vim            | Vimentin                                                                                 | P20152           | 53,655    | 2                             |

**Data File S1. NMB-1-binding candidates in DRG neurons.**

**Data File S2. NMB-1-binding candidates from differentiated ND-C cells.**
